# Supplementary material for: Bioinspired molecular engineering of bivalent aptamers by ligand-induced self-dimerization
Source: Royal Society of Chemistry journal article supplement (doi:10.1039/d2cc05799a), 2023-01-01

Electronic Supplementary Material (ESI) for Chemical Communications.  
This journal is © The Royal Society of Chemistry 2023

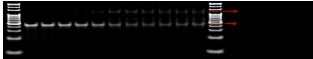

Supplement: d2cc05799a1.pdf [file d2cc05799a1.pdf]
