# Supplementary figures and images for: Bioinspired molecular engineering of bivalent aptamers by ligand-induced self-dimerization
Source: Royal Society of Chemistry journal article supplement (doi:10.1039/d2cc05799a), 2023-01-01

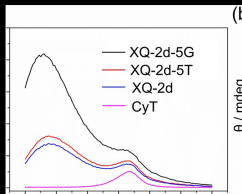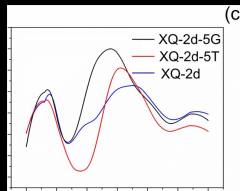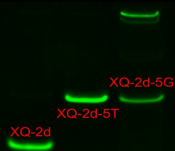

Supplement: d2cc05799a10.pdf [file d2cc05799a10.pdf]

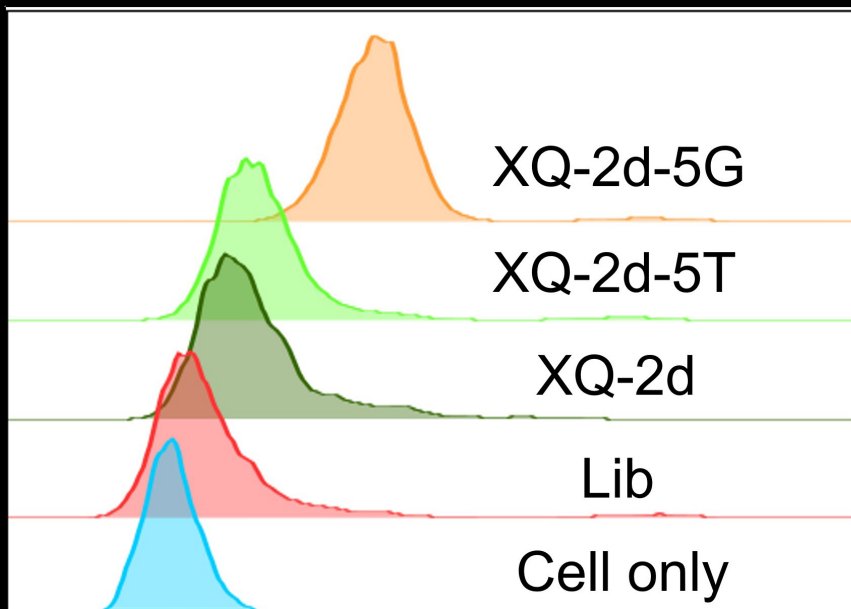

Supplement: d2cc05799a11.pdf [file d2cc05799a11.pdf]

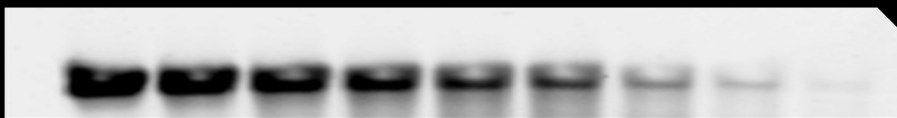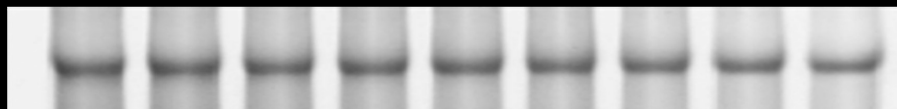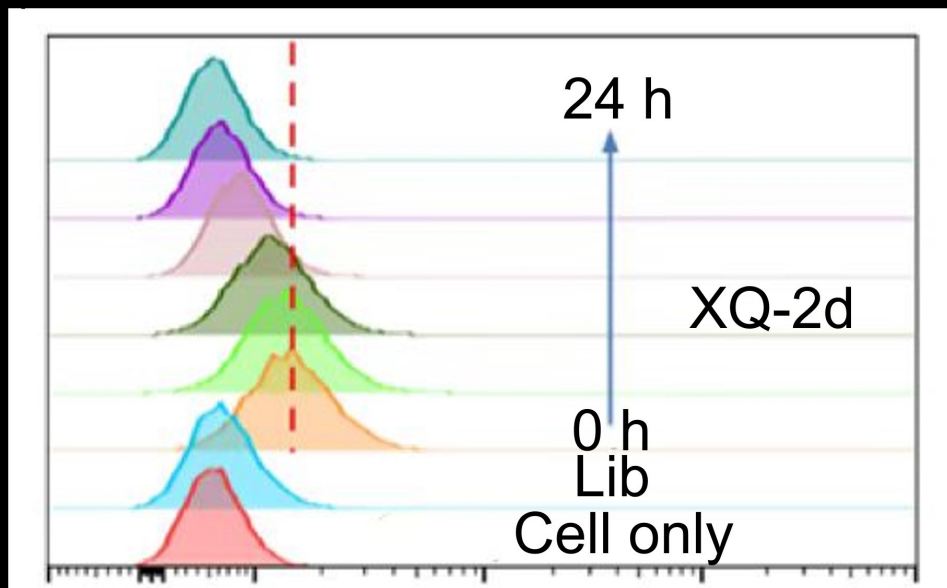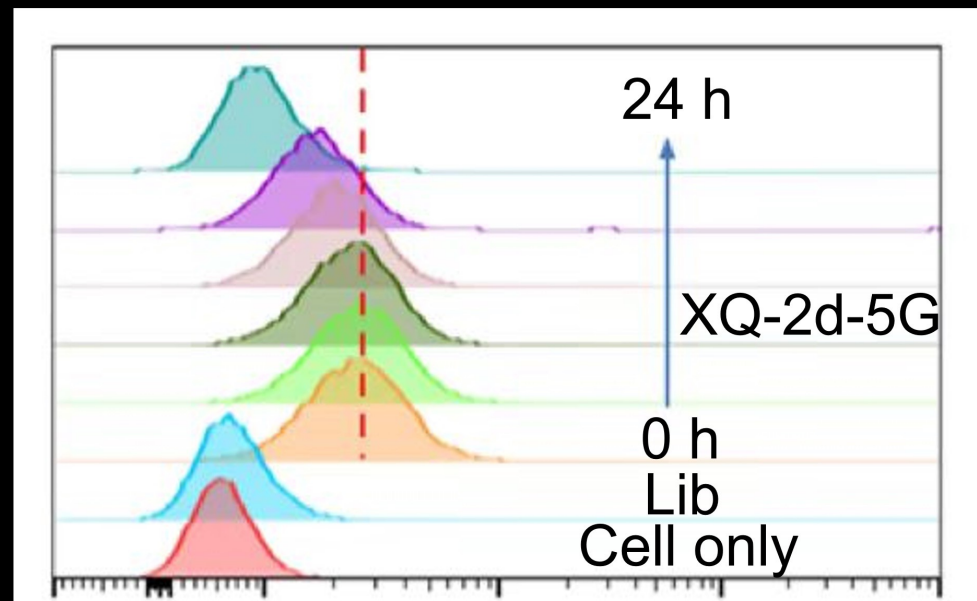

Supplement: d2cc05799a2.pdf [file d2cc05799a2.pdf]

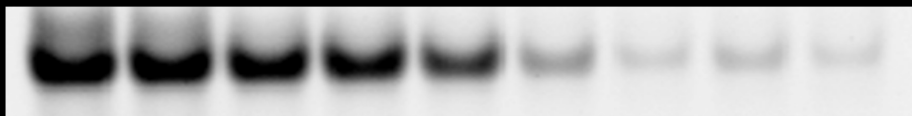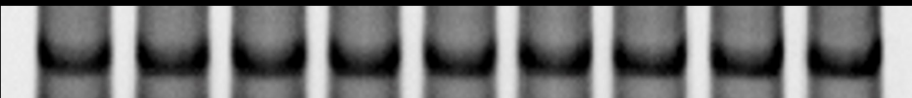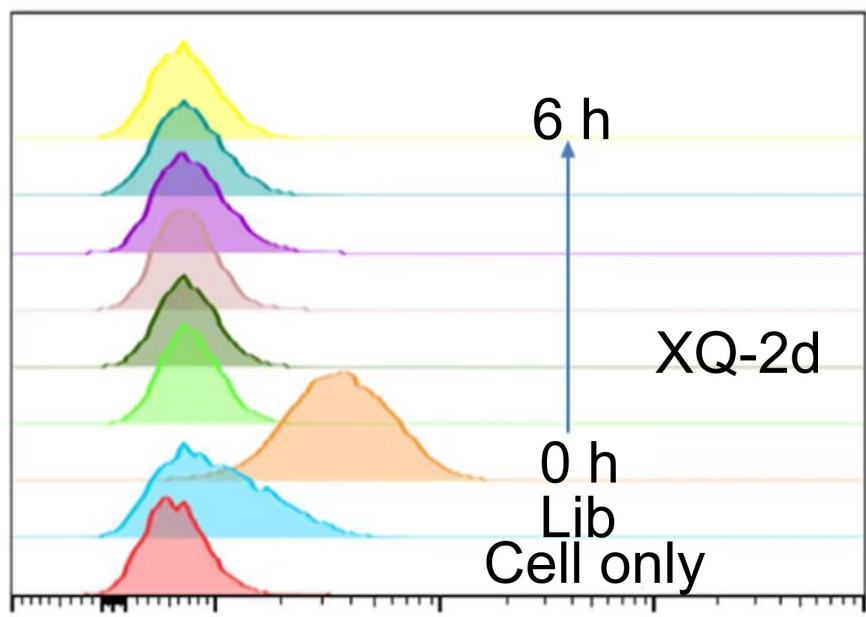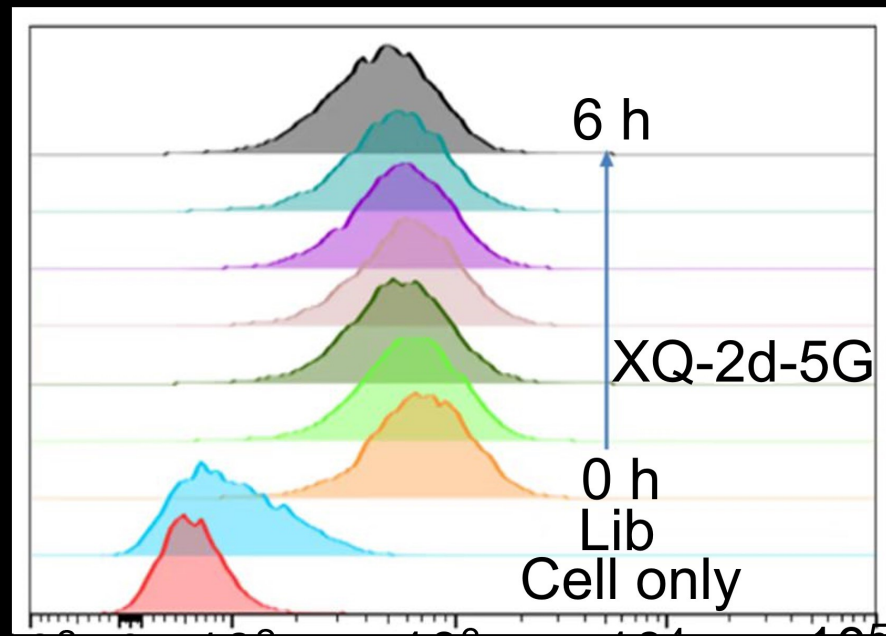

Supplement: d2cc05799a3.pdf [file d2cc05799a3.pdf]

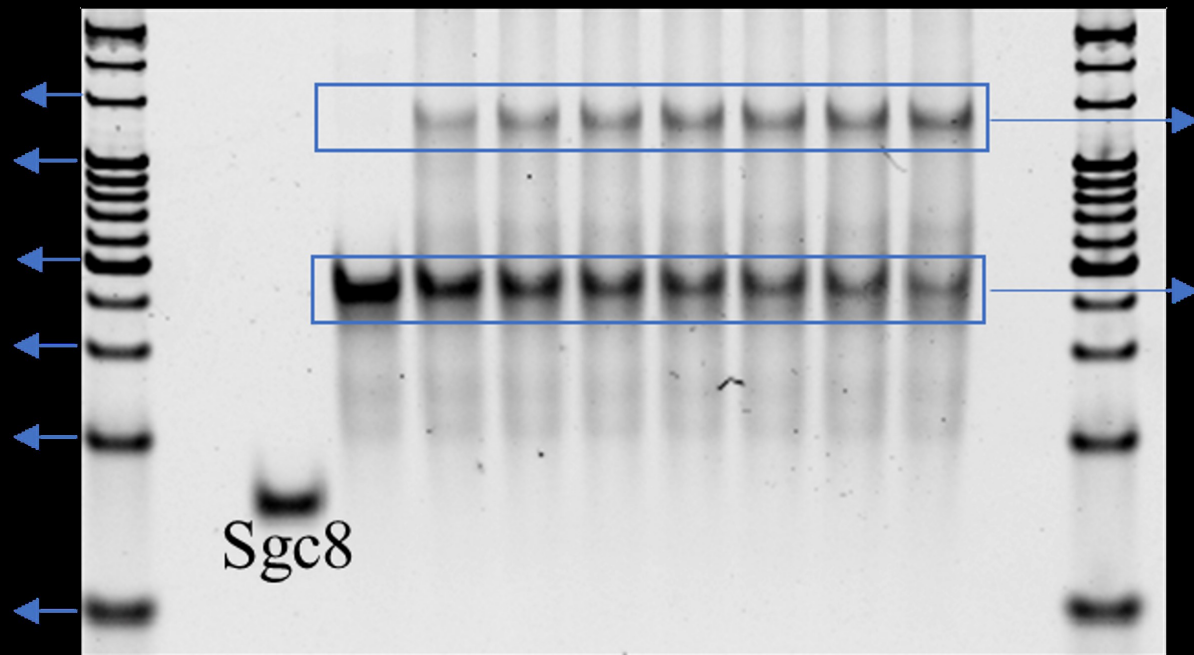

Supplement: d2cc05799a4.pdf [file d2cc05799a4.pdf]

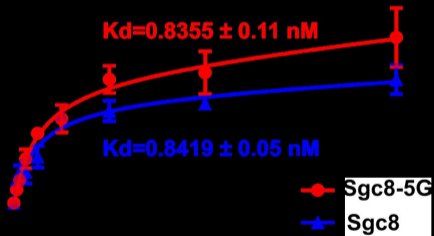

Supplement: d2cc05799a5.pdf [file d2cc05799a5.pdf]

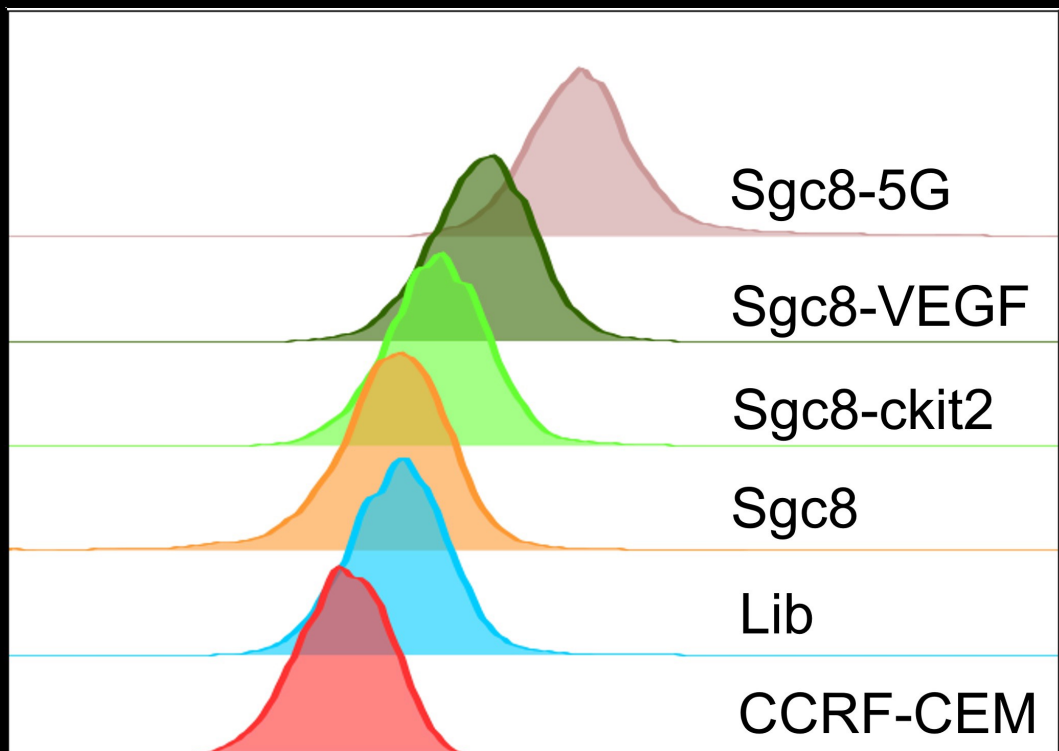

Supplement: d2cc05799a6.pdf [file d2cc05799a6.pdf]

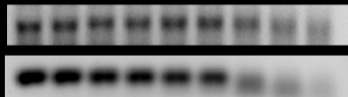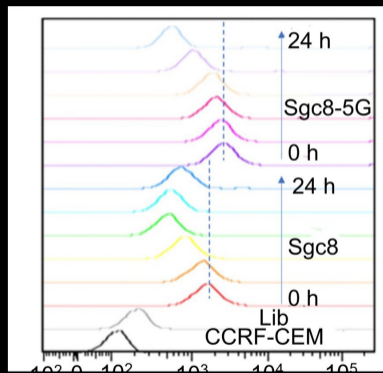

Supplement: d2cc05799a7.pdf [file d2cc05799a7.pdf]

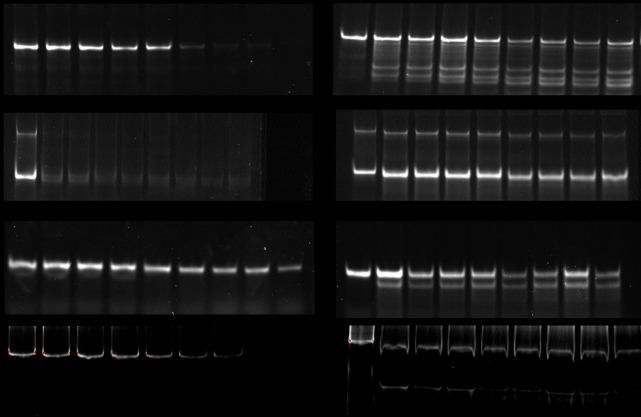

Supplement: d2cc05799a8.pdf [file d2cc05799a8.pdf]

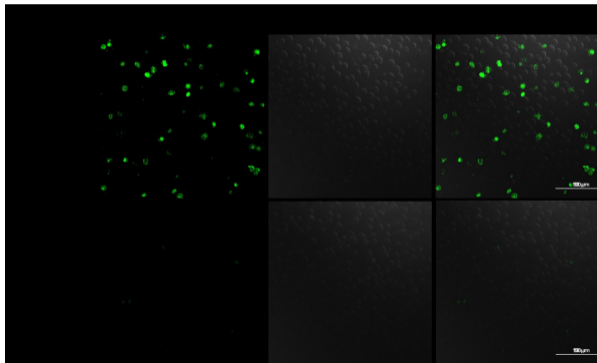

Supplement: d2cc05799a9.pdf [file d2cc05799a9.pdf]
